# Supplementary material
Source: Springer Nature journal article supplement (https://www.springermedizin.de/resource/supplementary/12916_2012_757_MOESM2_ESM.pdf/9598234)
Supplement: MOESM2 [file 9598234]

491 residents enrolled by 19 physician teams (nursing homes; covering 34 facilities)

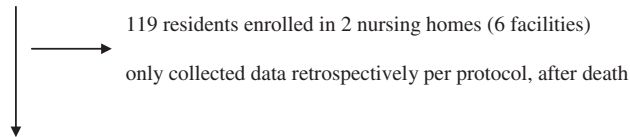

372 residents enrolled prospectively in 17 nursing homes (28 facilities)

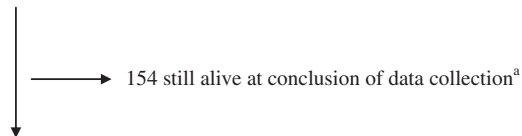

218 decedents

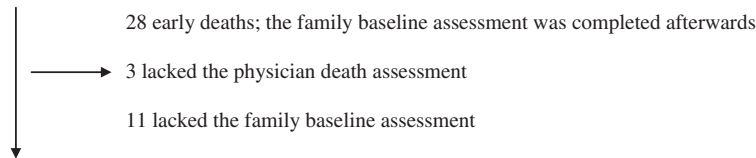

176 decedents with the main assessments prospectively

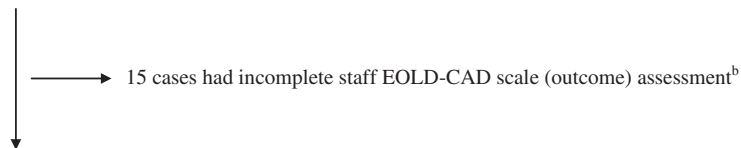

161 decedents selected for analyses
